# Supplementary material
Source: publisher figshare collection journal article supplement (https://acs.figshare.com/ndownloader/files/20468322)
Supplement: Supplementary file 1 [file 20468322]

# **Large, Highly Modular Narrow-Gap Electrolytic Flow Cell and Application in Dehydrogenative Cross-Coupling of Phenols**

Barbara Gleede‡, Maximilian Selt‡, Christoph Gütz, Andreas Stenglein, Siegfried R. Waldvogel\*

<sup>a</sup>Institute of Organic Chemistry, Johannes Gutenberg-University Mainz, Duesbergweg 10-14, D-55128 Mainz, Germany; Email: waldvogel@uni-mainz.de;

**Supporting Information**

## Table of Content

|       |                                                                          |     |
|-------|--------------------------------------------------------------------------|-----|
| 1     | General Information.....                                                 | S2  |
| 2     | Cell Design: Technical Drawings of the 4 cm × 12 cm Flow Cell.....       | S3  |
| 3     | General Protocol for the Cross-Coupling Reactions in a Flow Cell .....   | S10 |
| 4     | Reaction Mechanism .....                                                 | S10 |
| 5     | Conductivity Measurements.....                                           | S12 |
| 6     | Experiments in Flow .....                                                | S13 |
| 6.1   | Combination 1 .....                                                      | S13 |
| 6.1.1 | Screening of Supporting Electrolyte .....                                | S13 |
| 6.1.2 | Screening of Concentration and Ratio of the Starting Material .....      | S14 |
| 6.1.3 | Screening of Current Density .....                                       | S15 |
| 6.1.4 | Screening of Cascade Reaction .....                                      | S17 |
| 6.2   | Combination 2.....                                                       | S19 |
| 6.2.1 | Screening of Current Density .....                                       | S19 |
| 6.2.2 | Screening of Cascade Reaction .....                                      | S20 |
| 6.2.3 | Screening of Electrode Distance .....                                    | S21 |
| 6.2.4 | Screening of Current Density .....                                       | S22 |
| 6.3   | Combination 3.....                                                       | S24 |
| 6.3.1 | Screening of Cascade Reaction .....                                      | S24 |
| 6.3.2 | Screening of Current Density .....                                       | S25 |
| 7     | Synthesis of Non-symmetric Biphenols .....                               | S28 |
| 7.1   | 2,2'-Dihydroxy-3-methoxy-3',5,5'-trimethylbiphenyl.....                  | S28 |
| 7.2   | 2',4-Dihydroxy-3,5-dimethoxy-5'- <i>tert</i> -butylbiphenyl .....        | S29 |
| 7.3   | Methyl 3-hydroxy-4-(4'-hydroxy-3',5'-dimethoxyphenyl)-2-naphthoate ..... | S30 |
| 8     | References .....                                                         | S31 |

# 1 General Information

All of the reagents used were analytical-grade. Solvents were purified by standard methods.<sup>1</sup> As supporting electrolyte *N*-methyl-*N,N,N*-tributylammonium methylsulfate (kindly provided by BASF SE, Ludwigshafen, Germany) was used. For electrochemical reactions, boron-doped diamond (15  $\mu\text{m}$  diamond layer on silicon) was applied. BDD electrodes (DIACHEM™) were obtained from CONDIAS (Itzehoe, Germany).

**Conductivity measurements** were performed with a 856 Conductivity Module (Metrohm AG, Herisau, Switzerland) using a conductivity measuring cell 6.0915.100 Pt1000/B/2 0...70 °C (Metrohm AG, Herisau, Switzerland) and for PC control software tiamo 2.4 (Metrohm AG, Herisau, Switzerland).

**Column chromatography** was performed on silica gel 60 M (0.040–0.063 mm, Macherey-Nagel GmbH&Co, Düren, Germany) with a maximum pressure of 1.6 bar. As eluents mixtures of cyclohexane and ethyl acetate were used. Silica gel 60 sheets on aluminum (F254, Merck, Darmstadt, Germany) were employed for thin layer chromatography.

**Gas chromatography** was performed on a Shimadzu GC-2010 (Shimadzu, Japan) using a ZB-5 column (Phenomenex, USA; length: 30 m, inner diameter: 0.25 mm, film: 0.25 mm, carrier gas: hydrogen). GC-MS measurements were carried out on a Shimadzu GC-2010 (Shimadzu, Japan) using a ZB-5 column (Phenomenex, USA; length: 30 m, inner diameter: 0.25 mm, film: 0.25 mm, carrier gas: hydrogen). The method was coupled with mass spectrometry on a Shimadzu GCMS-QP2010.

**Melting points** were determined with a Melting Point Apparatus B-545 (Büchi, Flawil, Switzerland) and were uncorrected. Heating rate: 2°C/min.

**Spectroscopy and spectrometry:** <sup>1</sup>H NMR spectra were recorded at 25 °C by using a Bruker Avance III HD 400 (400 MHz) or (5 mm BBFO-SmartProbe with z gradient and ATM, SampleXPress 60 sample changer, Analytische Messtechnik, Karlsruhe, Germany). Chemical shifts ( $\delta$ ) are reported in parts per million (ppm) relative to TMS as internal standard or traces of CHCl<sub>3</sub> in the corresponding deuterated solvent. Mass spectra are obtained by using a MAT 95 (Finnigan, Germany) apparatus employing FD.

## 2 Cell Design: Technical Drawings of the 4 cm × 12 cm Flow Cell

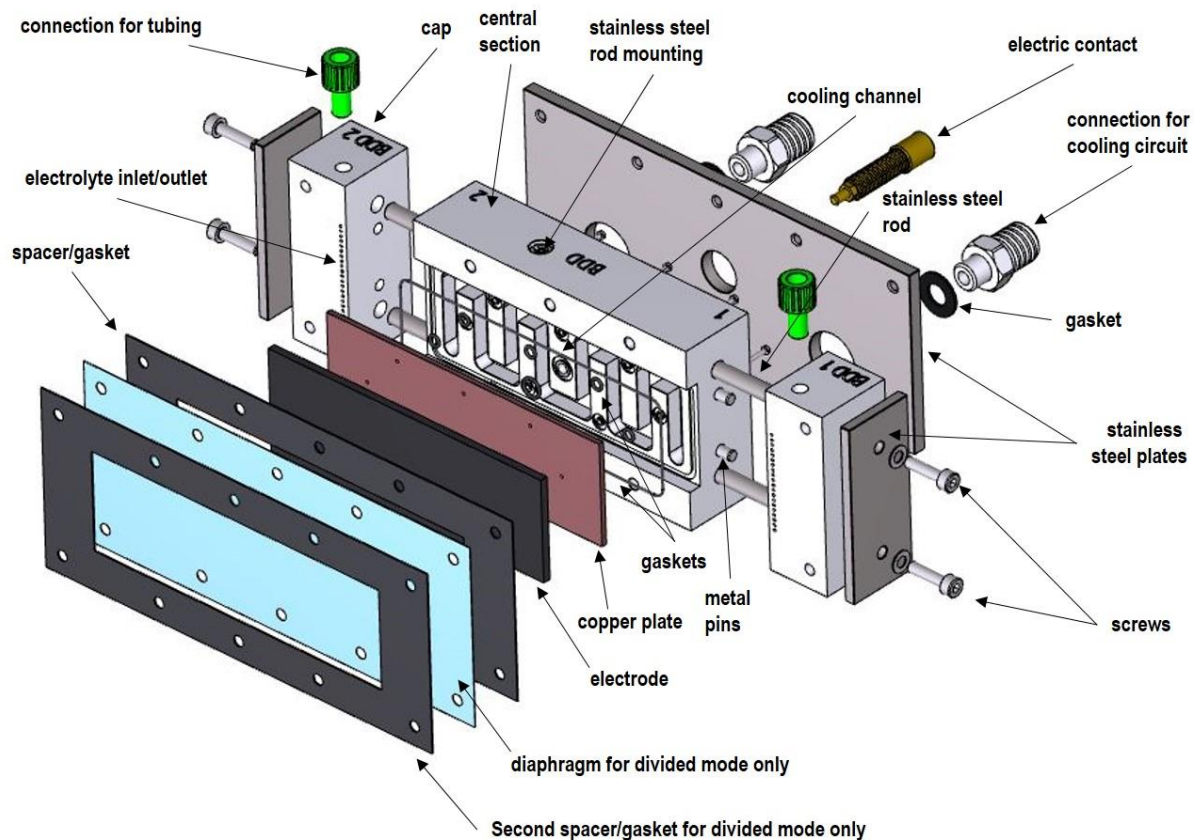

Figure S 1. Explosion drawing of one half-cell. The second spacer and the membrane are only necessary if the cell is run in divided mode.

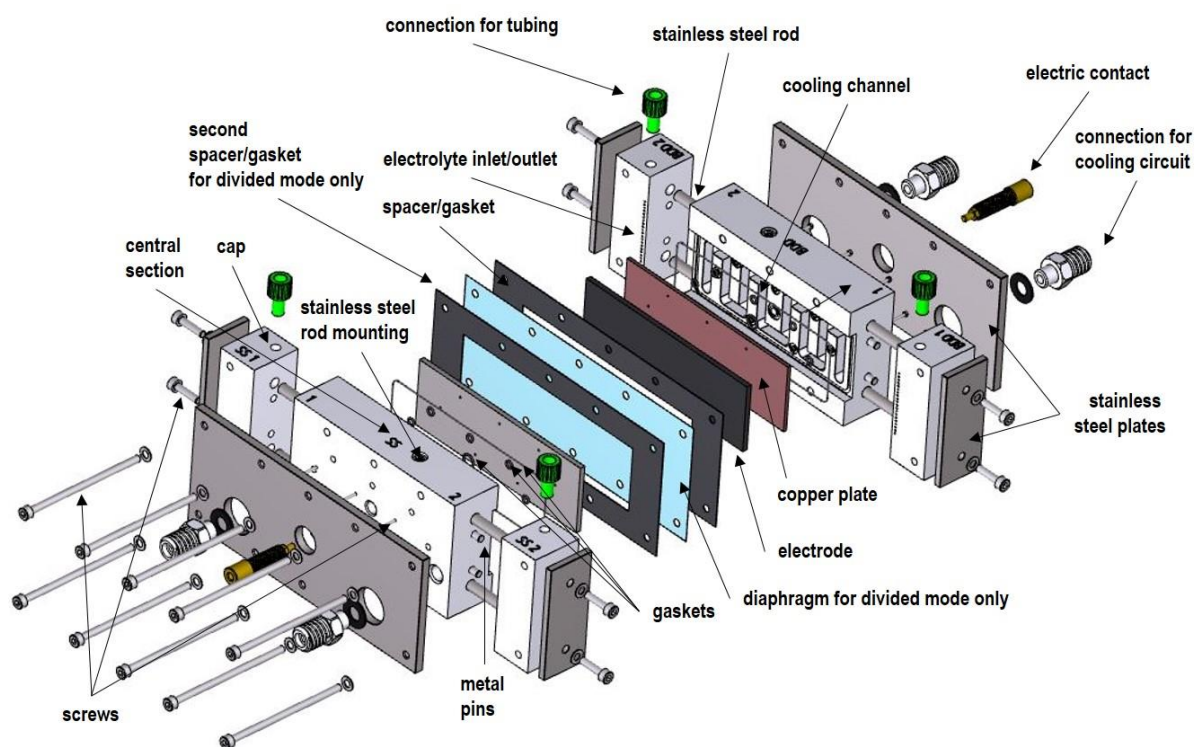

**Figure S 2.** Explosion drawing of the full 4 cm × 12 cm flow cell. The second spacer and the membrane are only necessary if the cell is run in divided mode.

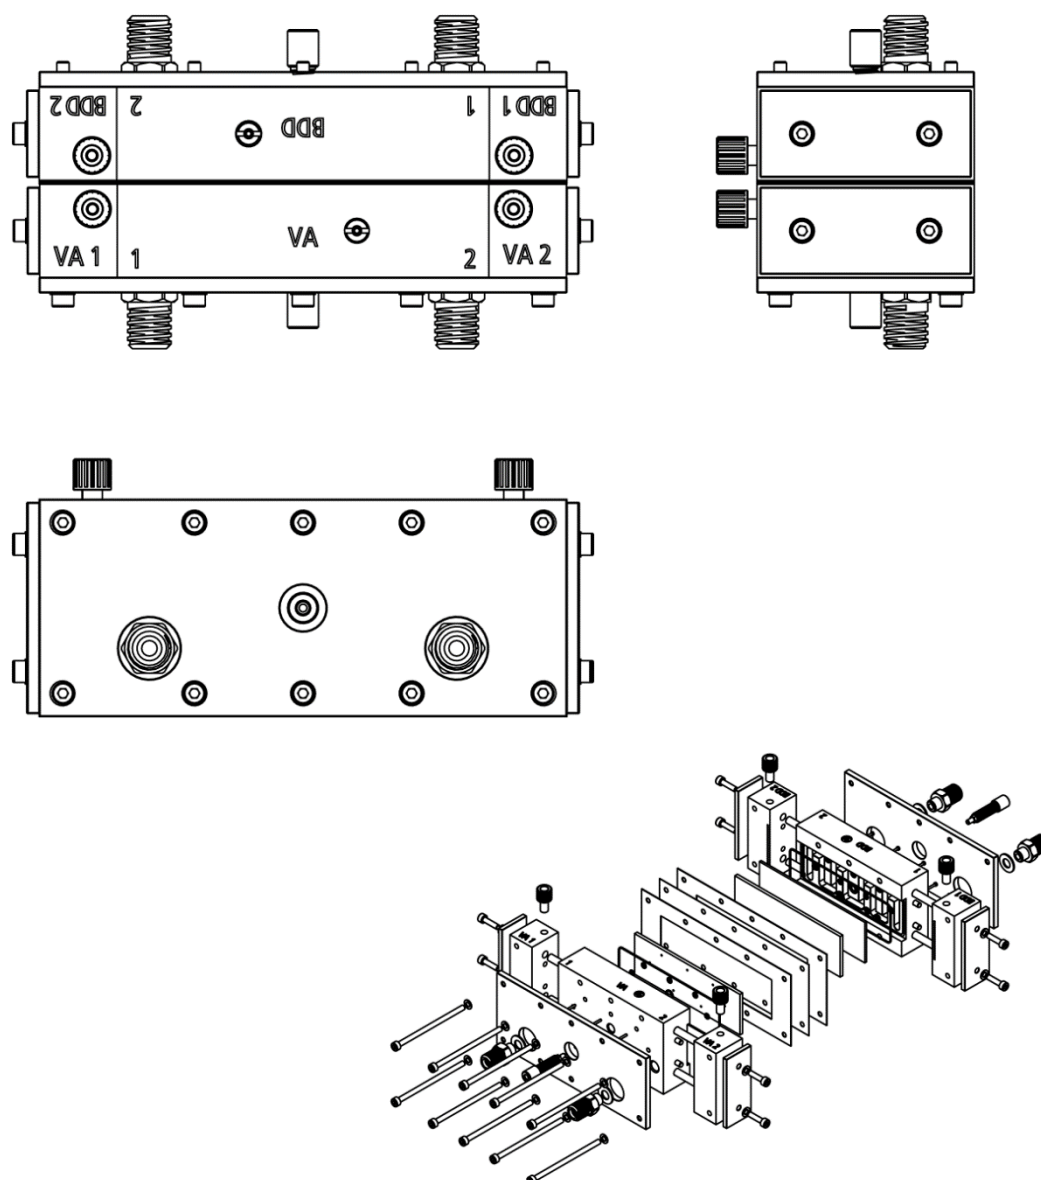

**Figure S 3. Technical drawing of the mounted 4 cm × 12 cm flow cell and explosion drawing of the 4 cm × 12 cm flow cell.**

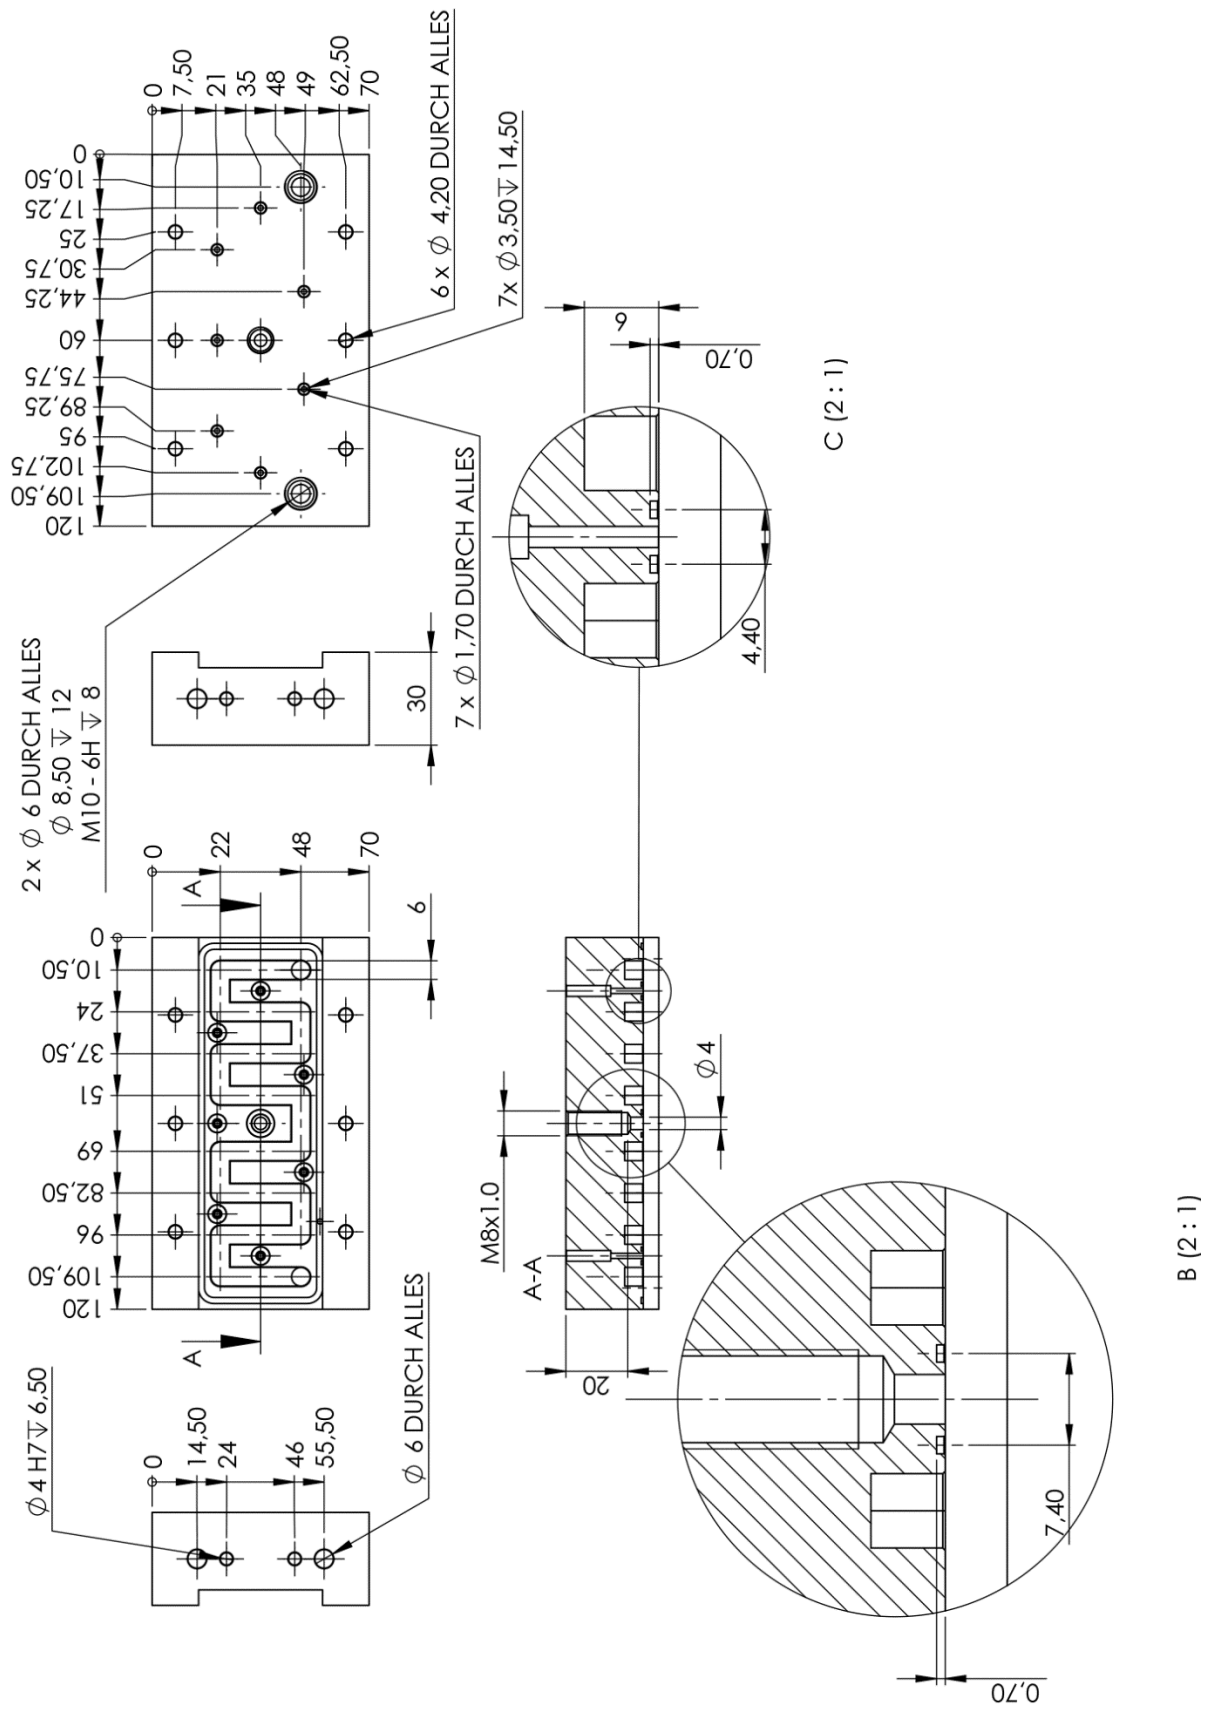

Figure S 4. Technical drawing of the Teflon pieces. All numbers in mm.

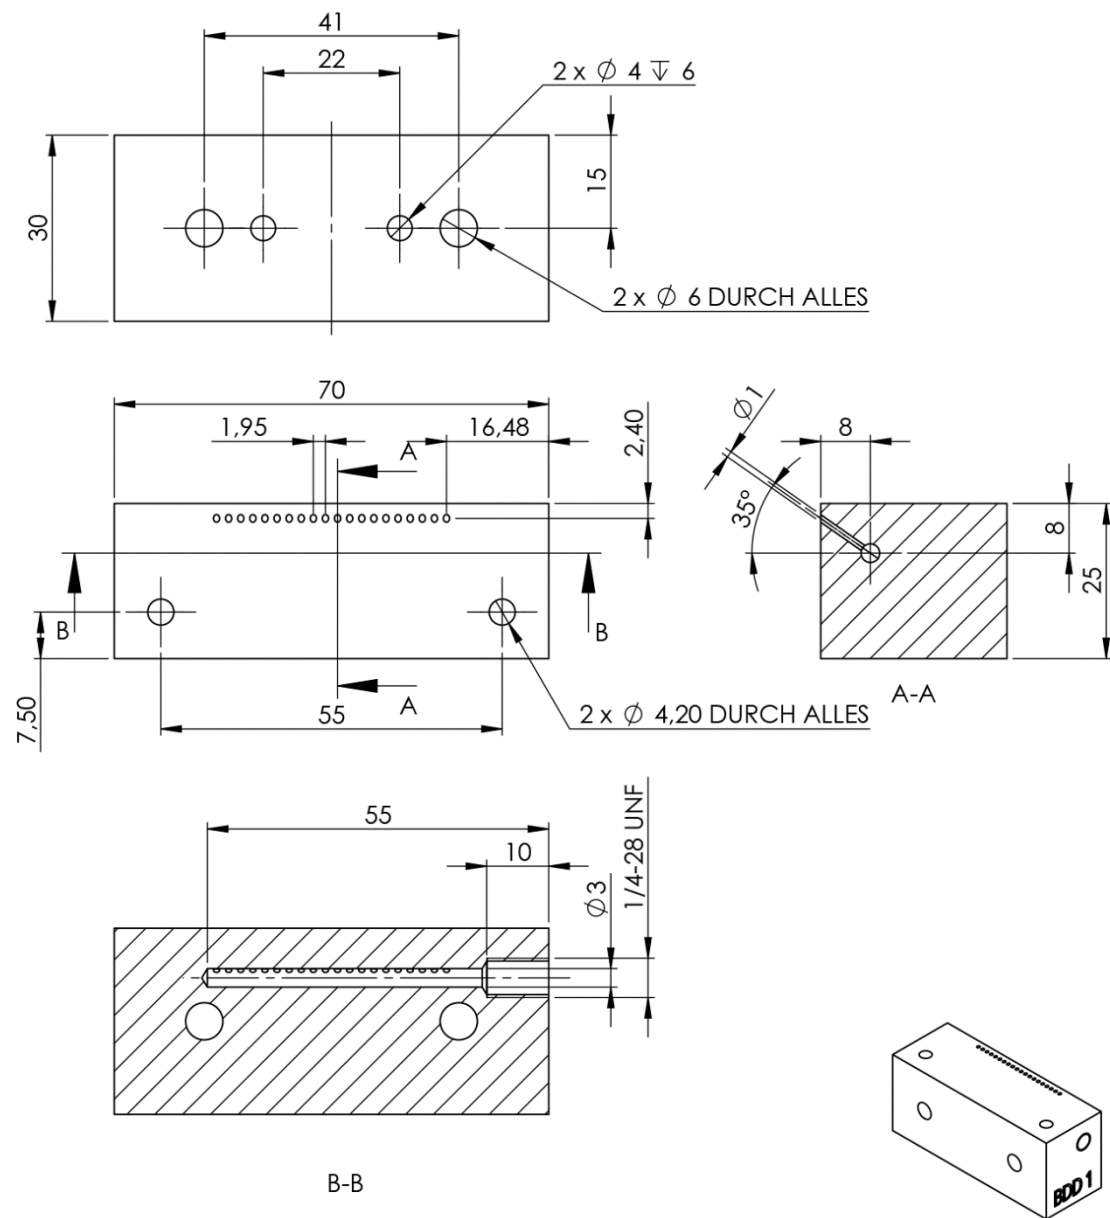

Figure S 5. Technical drawing of the Teflon caps. All numbers in mm.



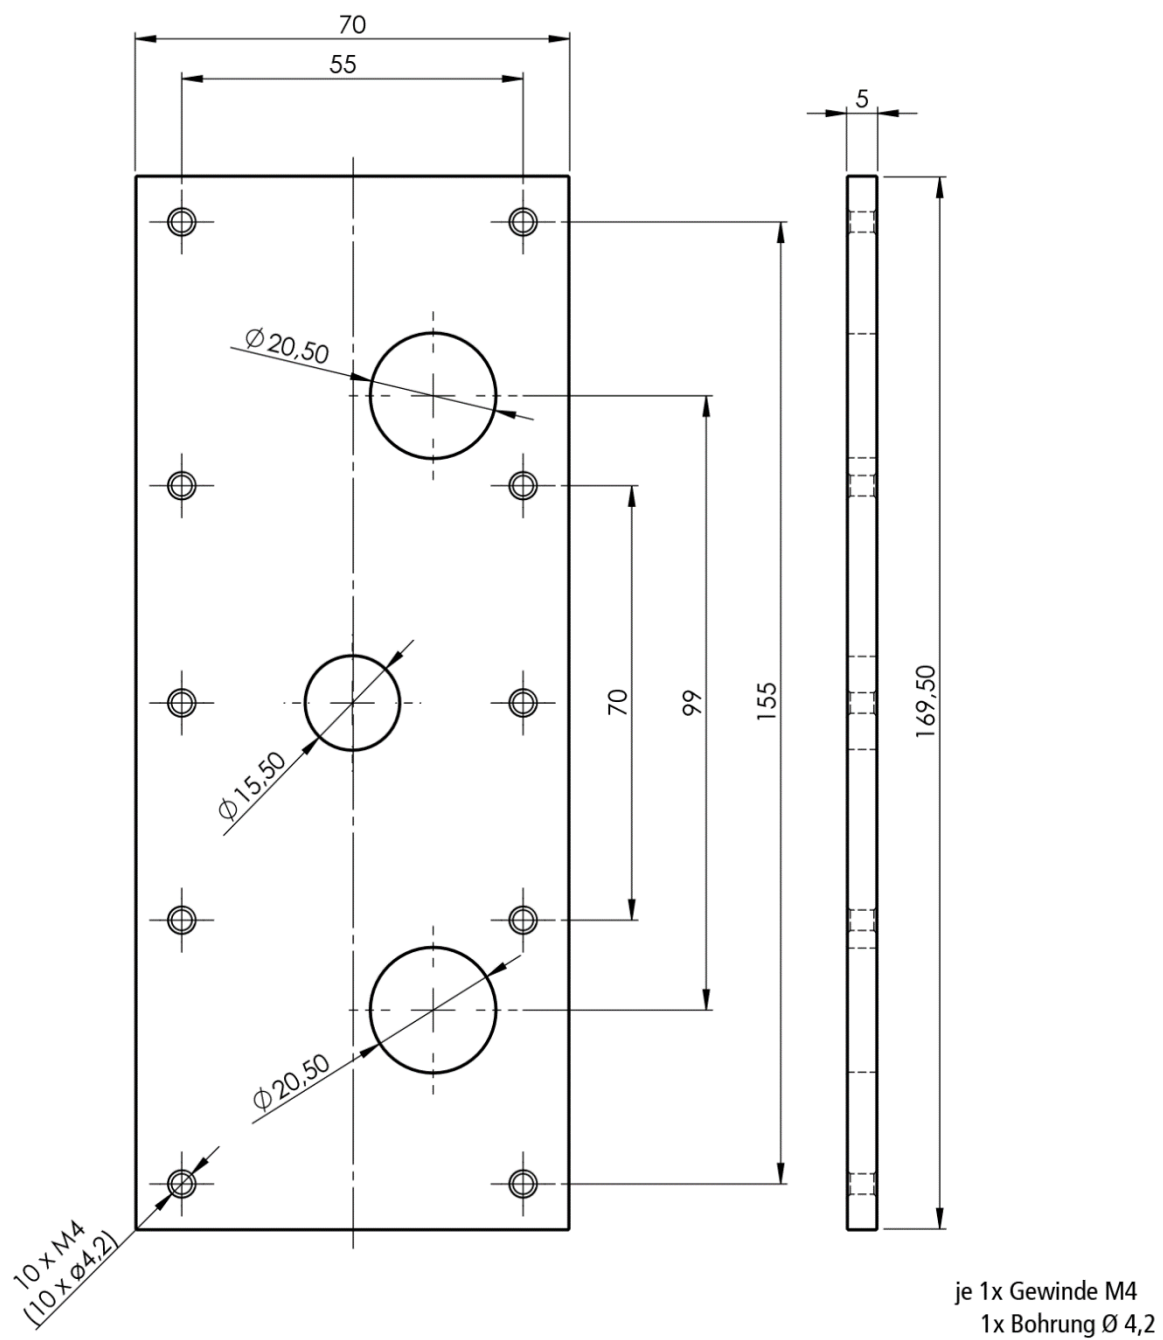

Figure S 6. Technical drawing of the stainless steel plates. All numbers in mm.

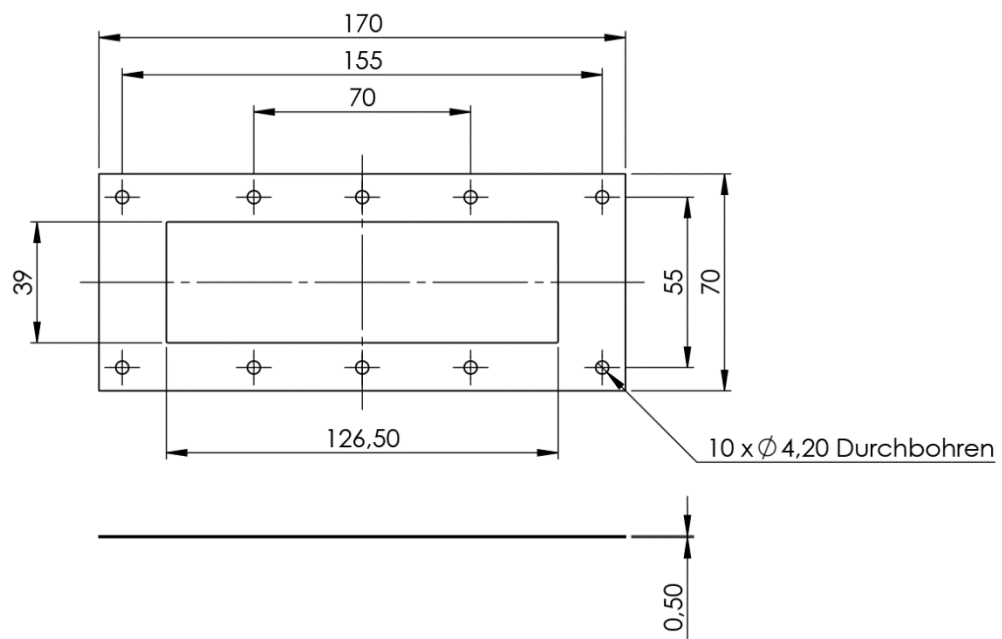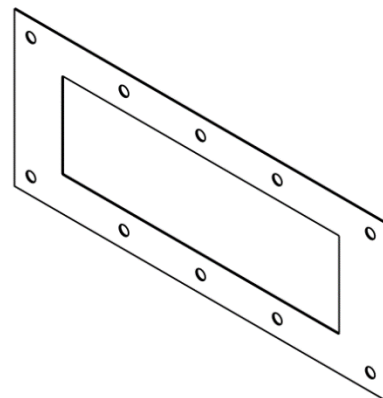

**Figure S 7. Technical drawing of the EPDM spacer. All numbers in mm.**

### 3 General Protocol for the Cross-Coupling Reactions in a Flow Cell

Both phenol components were dissolved in a solution of HFIP or HFIP with 18 vol % methanol and MeBu<sub>3</sub>NO<sub>3</sub>SOMe. The solution was pumped through the electrochemical flow cell. The corresponding electrochemical parameters were applied during electrolysis. After electrolysis the solvent was removed under reduced pressure, and the residue was prepared for internal standard procedure for gas chromatography measurements or purified by column chromatography and dried under reduced pressure to obtain the desired product.

### 4 Reaction Mechanism

The first step of the mechanistic sequence (Scheme S 1) of this reaction is, that the oxidation partner with lower oxidation potential **A** is oxidized at the boron-doped diamond (BDD) anode to form the phenoxyl radical **I**. This highly reactive radical intermediate is being attacked nucleophilic by the second coupling partner **B** and forms intermediate **II**. Intermediate **II** undergoes another one-electron oxidation at the BDD anode and extrudes a proton with a following rearomatization. Thereby, the desired non-symmetric biphenol **AB** is obtained.

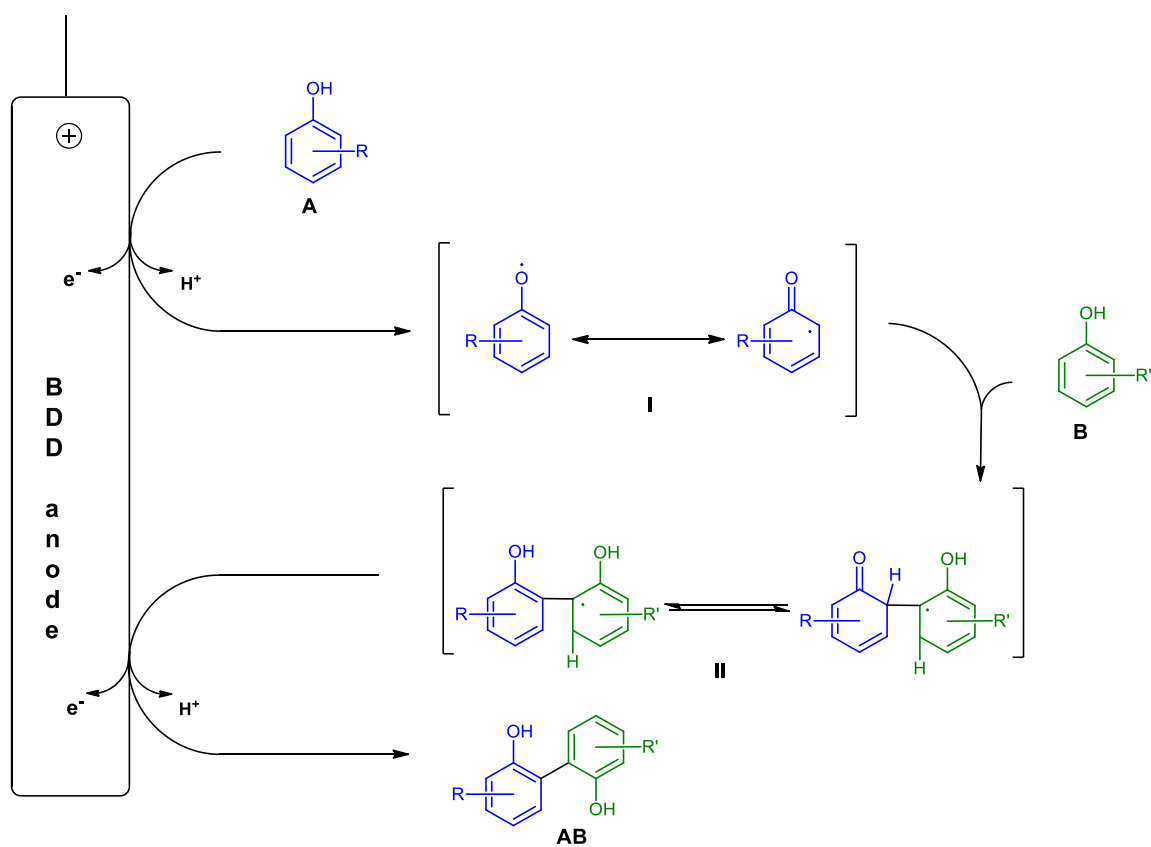

Scheme S 1: Postulated reaction mechanism of anodic C,C-cross-coupling reaction of phenols.<sup>2</sup>

## 5 Conductivity Measurements

### Calibration

For the calibration of the conductivity measuring cell the cell constant  $c$  was determined. Therefore, the conductivity  $\kappa_{measured}$  of a 0.1 M aqueous KCl solution was measured at 20 °C and compared to the theoretical conductivity of a 0.1 M aqueous KCl solution  $\kappa_{theo}$ :

$$c = \frac{\kappa_{theo}^{KCl}}{\kappa_{measured}^{KCl}} = \frac{11.67 \text{ mS/cm}}{16.80 \text{ mS/cm}} = 0.6905.$$

Then, the conductivities of each electrolyte solution ( $\kappa_{measured}^{el}$ ) was measured. The conductivity related to the cell constant ( $\kappa_{rel}^{el}$ ) was calculated as

$$\kappa_{rel}^{el} = \kappa_{measured}^{el} \cdot c.$$

**Table S 1. Conductivity of the used electrolyte solutions.**

| electrolyte solution                                                                       | $\kappa_{measured}^{el} / \text{S} \cdot \text{m}^{-1}$ | $\kappa_{rel}^{el} / \text{S} \cdot \text{m}^{-1}$ |
|--------------------------------------------------------------------------------------------|---------------------------------------------------------|----------------------------------------------------|
| 0.005 M MTBS in HFIP                                                                       | 0.0122                                                  | 0.0085                                             |
| 0.005 M MTBS in HFIP + 18 vol % MeOH                                                       | 0.0142                                                  | 0.0098                                             |
| 0.005 M MTBS, 0.15 M 2,6-dimethoxyphenol and 0.45 M methyl 3-hydroxynaphthoate in HFIP     | 0.0093                                                  | 0.0064                                             |
| 0.005 M MTBS, 0.15 M 2,6-dimethoxyphenol and 0.45 M 4- <i>tert</i> -butylphenol in HFIP    | 0.0083                                                  | 0.0057                                             |
| 0.005 M MTBS, 0.15 M 4-methylguaicol and 0.45 M 2,4-dimethylphenol in HFIP + 18 vol % MeOH | 0.0116                                                  | 0.0080                                             |

## 6 Experiments in Flow

For this manuscript, extensive experiments were performed on various parameters for the transfer to the flow cell of the anodic cross-coupling of phenols. This was not explained in detail in the manuscript, since not all screenings led to an optimization of the yield. However, these results are presented completely in the following:

### 6.1 Combination 1

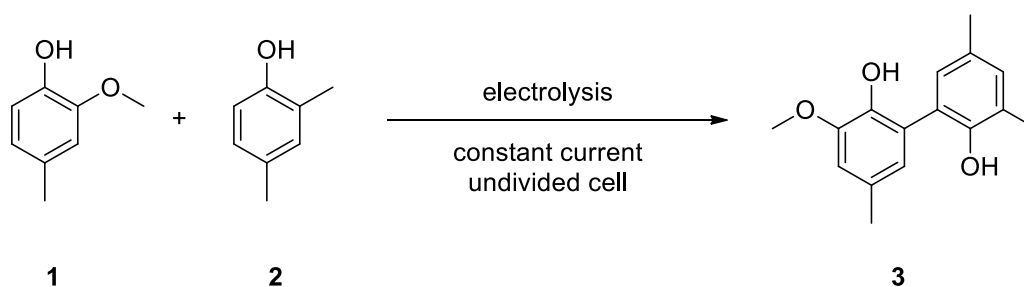

Scheme S 2. Anodic cross-coupling reaction of 2-methoxy-4-methylphenol 1 and 2,4-dimethylphenol 2.

#### 6.1.1 Screening of Supporting Electrolyte

As first parameter, the supporting electrolyte was studied in detail. First, the already known supporting electrolyte methyl tributylammonium methylsulfate ( $\text{MeBu}_3\text{NO}_3\text{SOMe}$ ) is used in the concentration of 0.9 mol/L taken as conditions from the batch cell. Here we were able to show, that the reaction is transferred successfully to the flow cell with 10% yield (Table S 2, entry 1). Using non supporting electrolyte at all was not successful, because it lead to a yield of only 5% of product (Table S 2, Entry 2). Therefore, different types of supporting electrolytes and different concentration thereof were tested (Table S 2, entry 3 – 8). Nevertheless, as a low-cost alternative, sulfuric acids and acetic acid were tested as additives. In contrast to acetic acid, sulfuric acid lead to a slight increase of the yield up to 17% (Table S 2, entry 3). With the sodium salt of HFIP as supporting electrolyte the same yield was obtained (Table S 2, entry 5). However, the reaction is still more selective using  $\text{MeBu}_3\text{NO}_3\text{SOMe}$  as supporting electrolyte, which is why  $\text{MeBu}_3\text{NO}_3\text{SOMe}$  was used as supporting electrolyte in all following reactions. Subsequently, the concentration of  $\text{MeBu}_3\text{NO}_3\text{SOMe}$  was varied. Due to the smaller electrode distance, only one twentieth of the amount of supporting electrolyte is required compared to the batch process (Table S 2, Entry 7).

**Table S 2. Optimization of anodic cross-coupling reaction in 2 cm × 6 cm flow cell: Variation of type and concentration of supporting electrolyte.<sup>a</sup>**

| Entry          | Supporting electrolyte                            | Flow [mL/min] | Current density [mA/cm <sup>2</sup> ] | Spacer [mm] | Yield <sup>b</sup> [%] |
|----------------|---------------------------------------------------|---------------|---------------------------------------|-------------|------------------------|
| 1 <sup>c</sup> | MeBu <sub>3</sub> NO <sub>3</sub> SOMe<br>0.09 M  | 0.100         | 5.0                                   | 0.12        | 10                     |
| 2 <sup>c</sup> | ---                                               | 0.128         | 5.0                                   | 0.12        | 5                      |
| 3 <sup>d</sup> | H <sub>2</sub> SO <sub>4</sub><br>0.1 M           | 0.088         | 5.0                                   | 0.12        | 17                     |
| 4 <sup>d</sup> | AcOH<br>0.001 M                                   | 0.088         | 5.0                                   | 0.12        | 4                      |
| 5 <sup>d</sup> | NaHFIP<br>0.1 M                                   | 0.088         | 5.0                                   | 0.12        | 17                     |
| 6 <sup>d</sup> | MeBu <sub>3</sub> NO <sub>3</sub> SOMe<br>0.01 M  | 0.091         | 5.0                                   | 0.12        | 37                     |
| 7 <sup>d</sup> | MeBu <sub>3</sub> NO <sub>3</sub> SOMe<br>0.005 M | 0.088         | 5.0                                   | 0.12        | 44                     |
| 8 <sup>d</sup> | MeBu <sub>3</sub> NO <sub>3</sub> SOMe<br>0.001 M | 0.088         | 5.0                                   | 0.12        | 15                     |

<sup>a</sup>**Reaction conditions:** 2-methoxy-4-methylphenol **1** c = 0.15 mol/L and 2,4-dimethylphenol **2** c = 0.45 mol/L in HFIP + 18 vol % methanol, cathode: nickel, anode: BDD, electrode surface: 12 cm<sup>2</sup>, rt. <sup>b</sup> Determined by GC using an internal standard. <sup>c</sup>Applied charge: 2.0*F*. <sup>d</sup>Applied charge: 2.8*F*.

### 6.1.2 Screening of Concentration and Ratio of the Starting Material

In the next step, the concentration and the ratio of the starting materials were examined. In all these experiments, the already optimized amount of supporting electrolyte of 0.005 M MeBu<sub>3</sub>NO<sub>3</sub>SOMe was used. The ratio of 2-methoxy-4-methylphenol **1** to 2,4-dimethylphenol **2** were varied from 1 : 1 to 1 : 5 (Table S 3, entry 1 – 5), the highest yield was obtained at a ratio of 1 : 3 (Table S 3, entry 3) analogous to the batch process. The concentration of **1** was then studied over the range from 0.05 mol/L to 0.60 mol/L, whereas in the ideal ratio of **1** to **2** was kept constant at 1 : 3 (Table S 3, entry 6 – 10). The optimal concentrations are still 0.15 mol/l for **1** and 0.45 mol/L for **2** (Table S 3, entry 3).

**Table S 3. Optimization of anodic cross-coupling reaction in 2 cm × 6 cm flow cell: Variation of concentration and ratio of starting material.<sup>a</sup>**

| Entry | Concentration 1<br>[mol/L] | Concentration 2<br>[mol/L] | Flow<br>[mL/min] | Ratio<br>A : B | Yield <sup>b</sup><br>[%] |
|-------|----------------------------|----------------------------|------------------|----------------|---------------------------|
| 1     | 0.15                       | 0.15                       | 0.088            | 1 : 1          | 36                        |
| 2     | 0.15                       | 0.30                       | 0.088            | 1 : 2          | 36                        |
| 3     | 0.15                       | 0.45                       | 0.088            | 1 : 3          | 44                        |
| 4     | 0.15                       | 0.60                       | 0.088            | 1 : 4          | 27                        |
| 5     | 0.15                       | 0.75                       | 0.088            | 1 : 5          | 27                        |
| 6     | 0.05                       | 0.15                       | 0.263            | 1 : 3          | 31                        |
| 7     | 0.10                       | 0.30                       | 0.131            | 1 : 3          | 43                        |
| 8     | 0.30                       | 0.90                       | 0.044            | 1 : 3          | 25                        |
| 9     | 0.45                       | 1.35                       | 0.029            | 1 : 3          | 28                        |
| 10    | 0.60                       | 1.80                       | 0.022            | 1 : 3          | 20                        |

<sup>a</sup>**Reaction conditions:** 2-methoxy-4-methylphenol **1** c = 0.15 mol/L and 2,4-dimethylphenol **2** in HFIP + 18 vol % methanol, supporting electrolyte: MeBu<sub>3</sub>NO<sub>3</sub>SOMe 0.005 M, cathode: nickel, anode: BDD, electrode surface: 12 cm<sup>2</sup>, current density j = 5 mA/cm<sup>2</sup>, rt. <sup>b</sup> Determined by GC using an internal standard. Applied charge: 2.8F.

### 6.1.3 Screening of Current Density

The current density was changed over the range of 5 – 55 mA/cm<sup>2</sup> to find the optimal current density for the anodic cross-coupling reaction (Table S 4, entry 1 – 10). When using higher current densities than 35 mA/cm<sup>2</sup> the yield decreases again. The optimal current density is 30 mA/cm<sup>2</sup> with a yield of 52% (Table S 4, entry 6). The electrode distance was then varied between 0.25 mm, 0.50 mm and 0.75 mm (Table S 4, entry 1 – 3). The highest yield could be achieved with the thinnest electrode distance of 0,25 mm and a yield of 52% (Table S 4, entry 11).



**Table S 4. Optimization of anodic cross-coupling reaction in 4 cm × 12 cm flow cell: Variation of current density and electrode distance at 10 °C.<sup>a</sup>**

| Entry          | Flow<br>[mL/min] | Current density<br>[mA/cm <sup>2</sup> ] | Temperature<br>[°C] | Spacer<br>[mm] | Yield <sup>b</sup><br>[%] |
|----------------|------------------|------------------------------------------|---------------------|----------------|---------------------------|
| 1 <sup>c</sup> | 0.351            | 5.0                                      | 10                  | 0.25           | 48                        |
| 2              | 0.702            | 10.0                                     | 10                  | 0.25           | 44                        |
| 3              | 1.051            | 15.0                                     | 10                  | 0.25           | 42                        |
| 4 <sup>c</sup> | 1.400            | 20.0                                     | 10                  | 0.25           | 46                        |
| 5              | 1.750            | 25.0                                     | 10                  | 0.25           | 47                        |
| 6              | 2.100            | 30.0                                     | 10                  | 0.25           | 52                        |
| 7              | 2.450            | 35.0                                     | 10                  | 0.25           | 50                        |
| 8              | 2.800            | 40.0                                     | 10                  | 0.25           | 36                        |
| 9              | 3.150            | 45.0                                     | 10                  | 0.25           | 36                        |
| 10             | 3.500            | 50.0                                     | 10                  | 0.25           | 29                        |
| 11             | 3.860            | 55.0                                     | 10                  | 0.25           | 26                        |
| 12             | 2.100            | 30.0                                     | 10                  | 0.25           | 52                        |
| 13             | 2.100            | 30.0                                     | 10                  | 0.50           | 45                        |
| 14             | 2.100            | 30.0                                     | 10                  | 0.75           | 37                        |

<sup>a</sup>**Reaction conditions:** 2-methoxy-4-methylphenol **1** c = 0.15 mol/L and 2,4-dimethylphenol **2** c = 0.45 mol/L in HFIP + 18 vol % methanol, supporting electrolyte: MeBu<sub>3</sub>NO<sub>3</sub>SOMe 0.005 M, cathode: stainless steel, anode: BDD, electrode surface: 48 cm<sup>2</sup>. <sup>b</sup>Determined by GC using an internal standard. <sup>c</sup>Applied charge: 2.8F.

**Table S 5. Optimization of anodic cross-coupling reaction in 4 cm × 12 cm flow cell: Variation of electrode distance.<sup>a</sup>**

| Entry | Flow<br>[mL/min] | Current density<br>[mA/cm <sup>2</sup> ] | Temperature<br>[°C] | Spacer<br>[mm] | Yield <sup>b</sup><br>[%] |
|-------|------------------|------------------------------------------|---------------------|----------------|---------------------------|
| 1     | 2.100            | 30.0                                     | 10                  | 0.25           | 52                        |
| 2     | 2.100            | 30.0                                     | 10                  | 0.50           | 45                        |
| 3     | 2.100            | 30.0                                     | 10                  | 0.75           | 37                        |

<sup>a</sup>**Reaction conditions:** 2-methoxy-4-methylphenol **1** *c* = 0.15 mol/L and 2,4-dimethylphenol **2** *c* = 0.45 mol/L in HFIP + 18 vol % methanol, supporting electrolyte: MeBu<sub>3</sub>NO<sub>3</sub>SOMe 0.005 M, cathode: stainless steel, anode: BDD, electrode surface: 48 cm<sup>2</sup>. <sup>b</sup> Determined by GC using an internal standard. <sup>c</sup>Applied charge: 2.8*F*.

#### 6.1.4 Screening of Cascade Reaction

The electrolysis conditions can also be varied in each run. Instead of a single run through a flow cell, the electrolyte is pumped through the cell in multiple runs. This results in two major advantages: First, due to a higher flow rate and a shorter dwell time respectively, the electrolyte don't heat up that strongly. Secondly, hydrogen, which is constantly evolving at the cathode as counter reaction, can be removed faster. At first the amount of charge was decreased in each run.

Therefore, the electrolyte was pumped through the cell once as reference (Figure S 8, blue), five times (Figure S 8, red) and 10 times (Figure S 8, green). Overall, it can be seen that the maximum yield achieved remains approximately 50%. Since only a charge amount of 2.0*F* per **1** is required for binding and a slight excess of 2.8*F* per **1** is used, not all runs are necessary for the cascade reaction. As shown in Figure S 8 (red), the maximum yield of 50% can be obtained with a cascade reaction of five runs after only four runs. Similarly, in the cascade reaction with 10 runs (Figure S 8, green) the electrolysis can be stopped after eight runs with a yield of 48%. This has the great advantage that the overoxidation of the product can be significantly reduced.

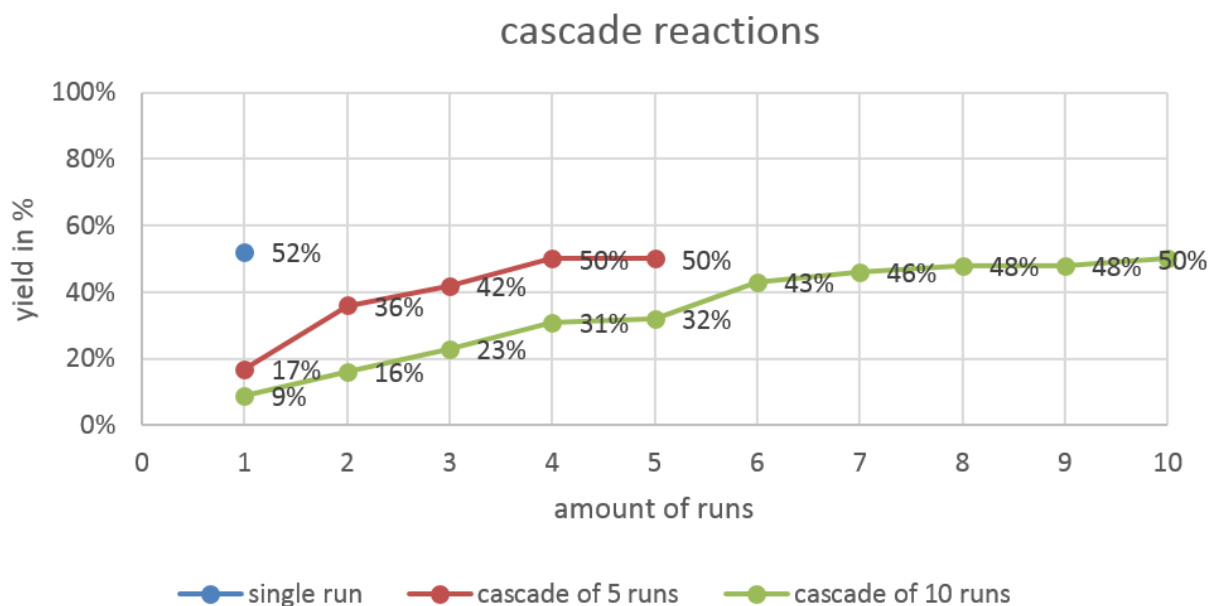

**Figure S 8. Cascade reaction with a different number of runs.**

**Reaction conditions:** 2-methoxy-4-methylphenol **1**  $c = 0.15$  mol/L and 2,4-dimethylphenol **2**  $c = 0.45$  mol/L in HFIP + 18 vol % methanol, supporting electrolyte: MeBu<sub>3</sub>NO<sub>3</sub>SOMe 0.005 M, cathode: stainless steel, anode: BDD, electrode surface: 48 cm<sup>2</sup>, applied charge: 2.8*F*, current density: 30 mA/cm<sup>2</sup>, Temperature: 10 °C, electrode distance: 0.25 mm. Yields determined by GC using an internal standard. blueAmount of runs: 1,  $Q = 2.8F$  per run, flow rate: 2.10 mL/min. redNumber of runs: 5,  $Q = 0.56F$  per run, flow rate: 10.50 mL/min. greenNumber of runs: 10,  $Q = 0.28F$  per run, flow rate: 21.00 mL/min.

## 6.2 Combination 2

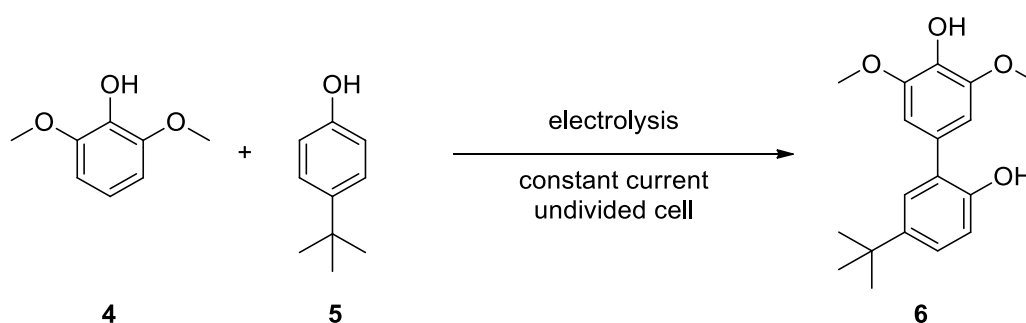

**Scheme S 3. Anodic cross-coupling of 2,6-dimethoxyphenol **4** with 4-(1,1-diethylmethyl)-phenol **5**.**

### 6.2.1 Screening of Current Density

The current density was increased over the range of 5 mA/cm<sup>2</sup> – 25 mA/cm<sup>2</sup>. Applying higher current densities the voltage become higher than the maximum of the device.

**Table S 6. Optimization of anodic cross-coupling reaction in 4 cm × 12 cm flow cell: Variation of electrode distance at 10 °C.<sup>a</sup>**

| Entry          | Flow<br>[mL/min] | Current density<br>[mA/cm <sup>2</sup> ] | Temperature<br>[°C] | Spacer<br>[mm] | Yield <sup>b</sup><br>[%] |
|----------------|------------------|------------------------------------------|---------------------|----------------|---------------------------|
| 1 <sup>c</sup> | 0.088            | 5.0                                      | rt                  | 0.25           | 36                        |
| 2              | 0.176            | 10.0                                     | rt                  | 0.25           | 42                        |
| 3              | 0.263            | 15.0                                     | rt                  | 0.25           | 53                        |
| 4              | 0.351            | 20.0                                     | rt                  | 0.25           | 59                        |
| 5              | 0.439            | 25.0                                     | rt                  | 0.25           | 56                        |

<sup>a</sup>**Reaction conditions:** 2,6-dimethoxyphenol **4** *c* = 0.15 mol/L and 4-*tert*-butylphenol **5** *c* = 0.45 mol/L in HFIP, supporting electrolyte: MeBu<sub>3</sub>NO<sub>3</sub>SOMe 0.005 M, cathode: nickel, anode: BDD, electrode surface: 12 cm<sup>2</sup>. <sup>b</sup> Determined by GC using an internal standard. Applied charge: 2.8*F*.

## 6.2.2 Screening of Cascade Reaction

Cascade reactions were performed for this combination (Figure S 9), as well. However, during the cascade reaction with 5 or 10 runs, strong heat development was detected in the later cycles. This resulted in a high terminal voltage during electrolysis. As a conclusion, in case of this reaction, the single run electrolysis in the 2 cm × 6 cm flow cell is preferred with a maximum yield of 59%.

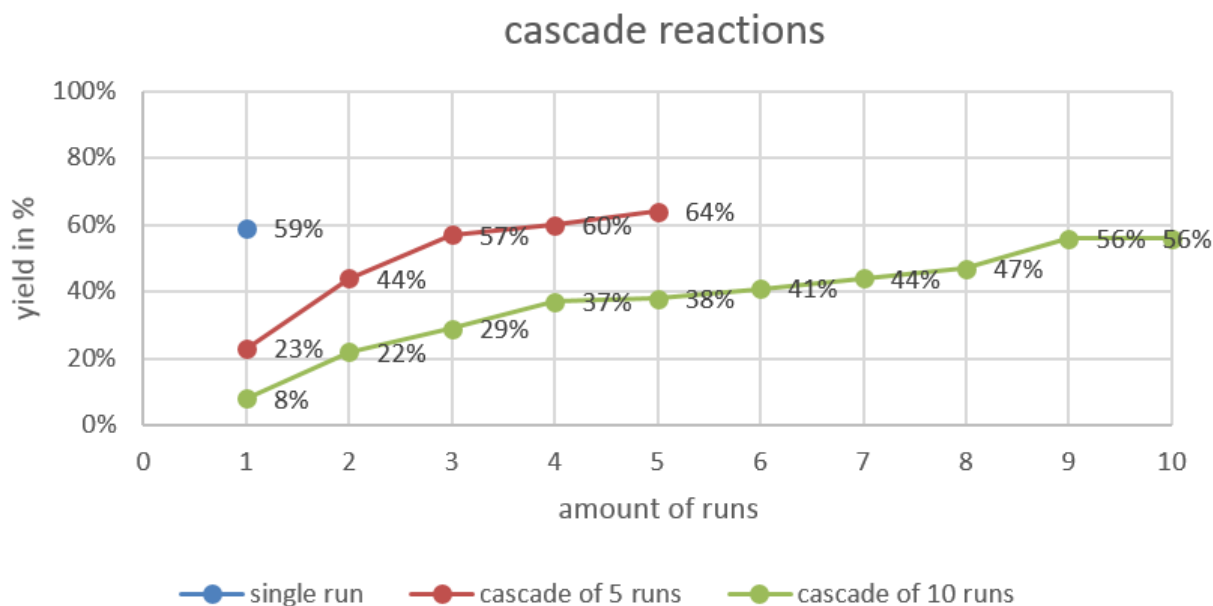

**Figure S 9. Cascade reaction with a different number of runs.**

**<sup>a</sup>Reaction conditions:** 2,6-dimethoxyphenol **4**  $c = 0.15$  mol/L and 4-*tert*-butylphenol **5**  $c = 0.45$  mol/L in HFIP, supporting electrolyte: MeBu<sub>3</sub>NO<sub>3</sub>SOMe 0.005 M, cathode: nickel, anode: BDD, electrode surface: 12 cm<sup>2</sup>, applied charge: 2.8*F*, current density: 20 mA/cm<sup>2</sup>, rt, electrode distance: 0.25 mm. Yields determined by GC using an internal standard. <sup>blue</sup>Number of runs: 1,  $Q = 2.8F$  per run, flow rate: 0.351 mL/min. <sup>red</sup>Number of runs: 5,  $Q = 0.56F$  per run, flow rate: 1.41 mL/min. <sup>green</sup>Number of runs: 10,  $Q = 0.28F$  per run, flow rate: 3.51 mL/min.

### 6.2.3 Screening of Electrode Distance

The cross-coupling reaction was transferred to the 4 cm × 12 cm flow cell and the electrode distance was checked with different spacers of 0.25 mm, 0.50 mm and 0.75 mm (Table S 7). However, it turned out that the smallest spacer of 0.25 mm already provided the highest yield with 43%.

**Table S 7. Optimization of anodic cross-coupling reaction in 4 cm × 12 cm flow cell: Variation of electrode distance at 10 °C.<sup>a</sup>**

| Entry          | Flow<br>[mL/min] | Current density<br>[mA/cm <sup>2</sup> ] | Temperature<br>[°C] | Spacer<br>[mm] | Yield <sup>b</sup><br>[%] |
|----------------|------------------|------------------------------------------|---------------------|----------------|---------------------------|
| 1 <sup>c</sup> | 1.41             | 20.0                                     | 10                  | 0.25           | 43                        |

|   |      |      |    |      |    |
|---|------|------|----|------|----|
| 2 | 1.41 | 20.0 | 10 | 0.50 | 34 |
| 3 | 1.41 | 20.0 | 10 | 0.75 | 35 |

<sup>a</sup>**Reaction conditions:** 2,6-dimethoxyphenol **4**  $c = 0.15$  mol/L and 4-*tert*-butylphenol **5**  $c = 0.45$  mol/L in HFIP, supporting electrolyte: MeBu<sub>3</sub>NO<sub>3</sub>SOMe 0.005 M, cathode: stainless steel, anode: BDD, electrode surface: 48 cm<sup>2</sup>. <sup>b</sup> Determined by GC using an internal standard. Applied charge: 2.8*F*.

#### 6.2.4 Screening of Current Density

The current density was changed over the range of 5 – 45 mA/cm<sup>2</sup> to find the optimal current density for the anodic cross-coupling reaction (Table S 8). At a temperature of 10 °C the highest possible current density was 30 mA/cm<sup>2</sup> (Table S 8, entry 6). By applying higher current densities, the terminal voltage surpasses the limit of the power supply. The optimal current density is 10 mA/cm<sup>2</sup> and gives a yield of 46% (Table S 8, entry 2). At a temperature of 20 °C the electrolysis could carry out over the range of 5 – 45 mA/cm<sup>2</sup> (Table S 9) with the highest yield of 49% at 15 mA/cm<sup>2</sup> (Table S 9, entry 3).

**Table S 8. Optimization of anodic cross-coupling reaction in 4 cm × 12 cm flow cell: Variation of current density at 10 °C.<sup>a</sup>**

| Entry          | Flow [mL/min] | Current density [mA/cm <sup>2</sup> ] | Temperature [°C] | Spacer [mm] | Yield <sup>b</sup> [%] |
|----------------|---------------|---------------------------------------|------------------|-------------|------------------------|
| 1 <sup>c</sup> | 0.351         | 5.0                                   | 10               | 0.25        | 40                     |
| 2              | 0.702         | 10.0                                  | 10               | 0.25        | 46                     |
| 3              | 1.051         | 15.0                                  | 10               | 0.25        | 39                     |
| 4 <sup>c</sup> | 1.400         | 20.0                                  | 10               | 0.25        | 43                     |
| 5              | 1.750         | 25.0                                  | 10               | 0.25        | 37                     |
| 6              | 2.100         | 30.0                                  | 10               | 0.25        | 40                     |

<sup>a</sup>**Reaction conditions:** 2,6-dimethoxyphenol **4** c = 0.15 mol/L and 4-*tert*-butylphenol **5** c = 0.45 mol/L in HFIP, supporting electrolyte: MeBu<sub>3</sub>NO<sub>3</sub>SOMe 0.005 M, cathode: stainless steel, anode: BDD, electrode surface: 48 cm<sup>2</sup>. <sup>b</sup> Determined by GC using an internal standard. Applied charge: 2.8F.

**Table S 9. Optimization of anodic cross-coupling reaction in 4 cm × 12 cm flow cell: Variation of current density at 20 °C.<sup>a</sup>**

| Entry          | Flow [mL/min] | Current density [mA/cm <sup>2</sup> ] | Temperature [°C] | Spacer [mm] | Yield <sup>b</sup> [%] |
|----------------|---------------|---------------------------------------|------------------|-------------|------------------------|
| 1 <sup>c</sup> | 0.351         | 5.0                                   | 20               | 0.25        | 42                     |
| 2              | 0.702         | 10.0                                  | 20               | 0.25        | 37                     |
| 3              | 1.051         | 15.0                                  | 20               | 0.25        | 49                     |

|                |       |      |    |      |    |
|----------------|-------|------|----|------|----|
| 4 <sup>c</sup> | 1.400 | 20.0 | 20 | 0.25 | 49 |
| 5              | 1.750 | 25.0 | 20 | 0.25 | 48 |
| 6              | 2.100 | 30.0 | 20 | 0.25 | 37 |
| 7              | 2.450 | 35.0 | 20 | 0.25 | 42 |
| 8              | 2.800 | 40.0 | 20 | 0.25 | 40 |
| 9              | 3.150 | 45.0 | 20 | 0.25 | 41 |

<sup>a</sup>**Reaction conditions:** 2,6-dimethoxyphenol **4**  $c = 0.15$  mol/L and 4-*tert*-butylphenol **5**  $c = 0.45$  mol/L in HFIP, supporting electrolyte: MeBu<sub>3</sub>NO<sub>3</sub>SOMe 0.005 M, cathode: stainless steel, anode: BDD, electrode surface: 48 cm<sup>2</sup>. <sup>b</sup> Determined by GC using an internal standard. Applied charge: 2.8*F*.

## 6.3 Combination 3

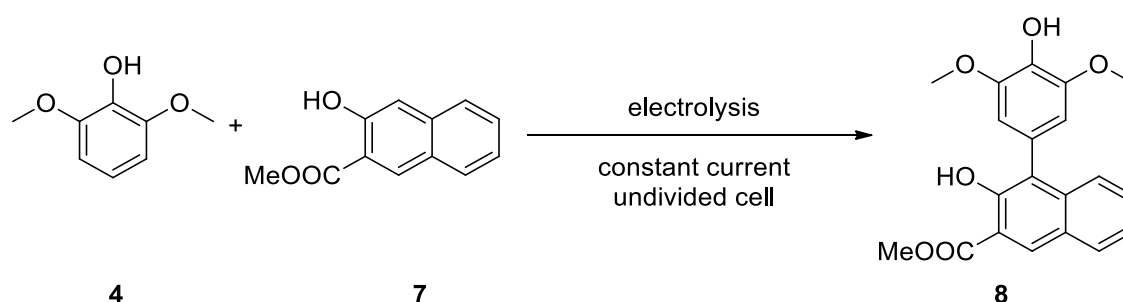

**Scheme S 4.** Anodic cross-coupling of 2,6-dimethoxyphenol **4** with methyl 3-hydroxy-2-naphthoate **7**.

### 6.3.1 Screening of Cascade Reaction

Cascade reaction studies were also performed as single run, five run cascade and 10 run cascade. Again, the cascade reactions are feasible but not necessary due to the high yield in the single cycle reaction. Due to the slight excess of applied charge (2.8*F* /mol **4**), the five run cascade reaction and the 10 run cascade reaction with already be terminated after 4 runs or 8 runs, respectively. So, the resulting product is protected from overoxidation (Figure S 10). As a conclusion, in case of



this reaction, the single run electrolysis in the 2 cm × 6 cm flow cell is preferred with a maximum yield of 91%.

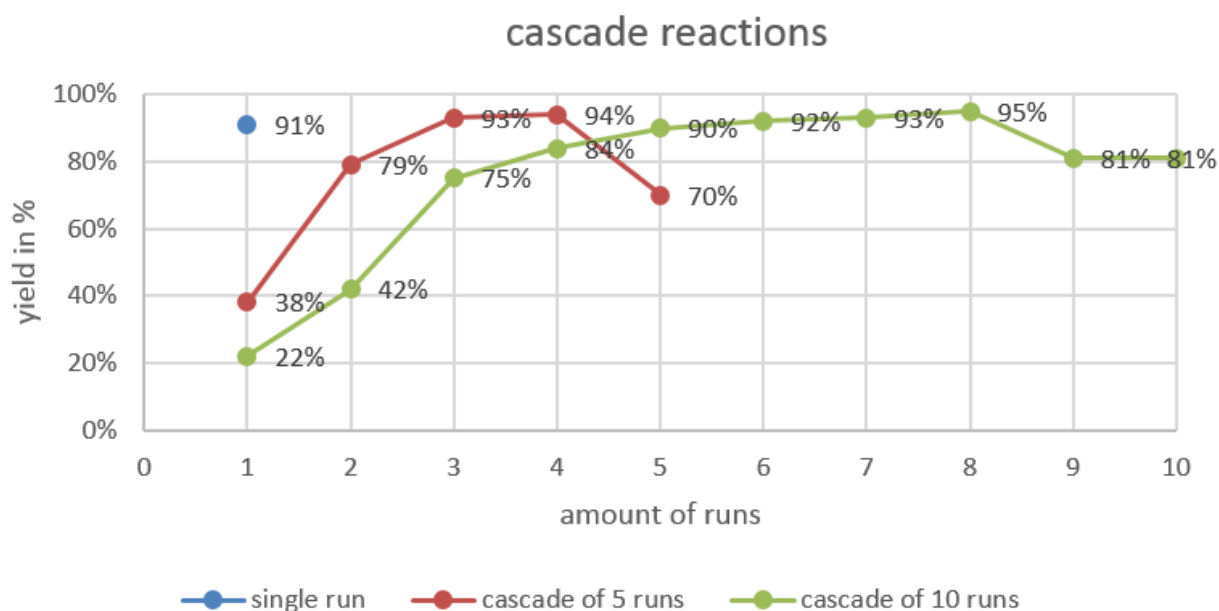

**Figure S 10. Cascade reaction with a different number of runs.**

**Reaction conditions:** 2,6-dimethoxyphenol **4**  $c = 0.15$  mol/L and methyl 3-hydroxy-2-naphthoate **7**  $c = 0.45$  mol/L in HFIP, supporting electrolyte: MeBu<sub>3</sub>NO<sub>3</sub>SOMe 0.005 M, cathode: nickel, anode: BDD, electrode surface: 12 cm<sup>2</sup>, applied charge: 2.8*F*, current density: 20 mA/cm<sup>2</sup>, rt, electrode distance: 0.25 mm. Yields determined by GC using an internal standard. <sup>blue</sup>Number of runs: 1,  $Q = 2.8F$  per run, flow rate: 0.351 mL/min. <sup>red</sup>Number of runs: 5,  $Q = 0.56F$  per run, flow rate: 1.76 mL/min. <sup>green</sup>Number of runs: 10,  $Q = 0.28F$  per run, flow rate: 3.51 mL/min.

### 6.3.2 Screening of Current Density

The current density was changed over the range of 5 – 40 mA/cm<sup>2</sup> at a temperature of 10 °C to find the optimal current density for the anodic cross-coupling reaction (Table S 10). The optimal current density is reached at 15 mA/cm<sup>2</sup> with a yield of 94% (Table S 10, entry 3). At a temperature of 20 °C the electrolysis could carry out over the range of 5 – 45 mA/cm<sup>2</sup> (Table S 11) with the highest yield of 87% at 10 mA/cm<sup>2</sup> (Table S 11, entry 2).

**Table S 10. Optimization of anodic cross-coupling reaction in 4 cm × 12 cm flow cell: Variation of current density at 10 °C.<sup>a</sup>**

| Entry          | Flow<br>[mL/min] | Current density<br>[mA/cm <sup>2</sup> ] | Temperature<br>[°C] | Spacer<br>[mm] | Yield <sup>b</sup><br>[%] |
|----------------|------------------|------------------------------------------|---------------------|----------------|---------------------------|
| 1 <sup>c</sup> | 0.351            | 5.0                                      | 10                  | 0.25           | 82                        |
| 2              | 0.702            | 10.0                                     | 10                  | 0.25           | 87                        |
| 3              | 1.051            | 15.0                                     | 10                  | 0.25           | 94                        |
| 4 <sup>c</sup> | 1.400            | 20.0                                     | 10                  | 0.25           | 86                        |
| 5              | 1.750            | 25.0                                     | 10                  | 0.25           | 88                        |
| 6              | 2.100            | 30.0                                     | 10                  | 0.25           | 76                        |
| 7              | 2.450            | 35.0                                     | 20                  | 0.25           | 74                        |
| 8              | 2.800            | 40.0                                     | 20                  | 0.25           | 66                        |

<sup>a</sup>**Reaction conditions:** 2,6-dimethoxyphenol **4** *c* = 0.15 mol/L and methyl 3-hydroxy-2-naphthoate **7** *c* = 0.45 mol/L in HFIP, supporting electrolyte: MeBu<sub>3</sub>NO<sub>3</sub>SOMe 0.005 M, cathode: stainless steel, anode: BDD, electrode surface: 48 cm<sup>2</sup>. <sup>b</sup> Determined by GC using an internal standard. Applied charge: 2.8*F*.

**Table S 11. Optimization of anodic cross-coupling reaction in 4 cm × 12 cm flow cell: Variation of current density at 20 °C.<sup>a</sup>**

| Entry | Flow<br>[mL/min] | Current densit<br>[mA/cm <sup>2</sup> ] | Temperature<br>[°C] | Spacer<br>[mm] | Yield <sup>b</sup><br>[%] |
|-------|------------------|-----------------------------------------|---------------------|----------------|---------------------------|
|-------|------------------|-----------------------------------------|---------------------|----------------|---------------------------|

|                |       |      |    |      |    |
|----------------|-------|------|----|------|----|
| 1 <sup>c</sup> | 0.351 | 5.0  | 20 | 0.25 | 77 |
| 2              | 0.702 | 10.0 | 20 | 0.25 | 87 |
| 3              | 1.051 | 15.0 | 20 | 0.25 | 77 |
| 4 <sup>c</sup> | 1.400 | 20.0 | 20 | 0.25 | 75 |
| 5              | 1.750 | 25.0 | 20 | 0.25 | 73 |
| 6              | 2.100 | 30.0 | 20 | 0.25 | 81 |
| 7              | 2.450 | 35.0 | 20 | 0.25 | 85 |
| 8              | 2.800 | 40.0 | 20 | 0.25 | 67 |
| 9              | 3.150 | 45.0 | 20 | 0.25 | 68 |

<sup>a</sup>**Reaction conditions:** 2,6-dimethoxyphenol **4** *c* = 0.15 mol/L and methyl 3-hydroxy-2-naphthoate **7** *c* = 0.45 mol/L in HFIP, supporting electrolyte: MeBu<sub>3</sub>NO<sub>3</sub>SOMe 0.005 M, cathode: stainless steel, anode: BDD, electrode surface: 48 cm<sup>2</sup>. <sup>b</sup> Determined by GC using an internal standard. Applied charge: 2.8*F*.

## 7 Synthesis of Non-symmetric Biphenols

### 7.1 2,2'-Dihydroxy-3-methoxy-3',5,5'-trimethylbiphenyl

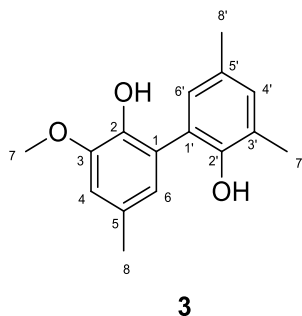

2-Methoxy-4-methylphenol **1** and 2,4-dimethylphenol **2** were dissolved in a solution of HFIP with 18 vol % methanol and MeBu<sub>3</sub>NO<sub>3</sub>SOMe. The solution was transferred into a beaker-type cell or pumped through the electrochemical flow cell. The corresponding electrochemical parameters were applied during electrolysis. After electrolysis the solvent was removed under reduced pressure, and the residue was prepared for internal standard procedure for gas chromatography measurements or purified by column chromatography (cyclohexane/ethyl acetate (4 : 1)). The desired product was obtained as colourless solid. mp: 120 °C (cyclohexane/ethyl acetate (4 : 1)); R<sub>f</sub>: 0.29 (cyclohexane/ethyl acetate (4 : 1)); HRMS for C<sub>16</sub>H<sub>18</sub>O<sub>3</sub> (ESI+) [M+Na<sup>+</sup>]: calc.: 281.1154, found: 281.1152.

<sup>1</sup>H NMR (400 MHz, CDCl<sub>3</sub>): δ [ppm]= 6.99 – 6.98 (m, 1H, *H*-4'), 6.93 – 6.92 (m, 1H, *H*-6'), 6.73 (m, 2H, *H*-3'), 3.94 (s, 3H, *H*-2, *H*-6), 2.34 (s, 3H, *H*-7, *H*-8), 2.30 (s, 3H, *H*-8'), 2.29 (s, 3H, *H*-7, *H*-8).

Analytical data in agreement with those previously reported.<sup>3</sup>

## 7.2 2',4-Dihydroxy-3,5-dimethoxy-5'-*tert*-butylbiphenyl

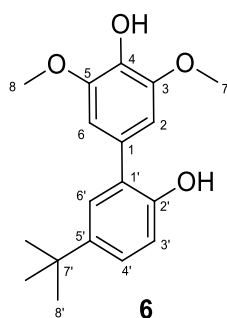

2,6-Dimethoxyphenol **4** and 4-*tert*-butylphenol **5** were dissolved in a solution of HFIP and MeBu<sub>3</sub>NO<sub>3</sub>SOMe. The solution was transferred into a beaker-type cell or pumped through the electrochemical flow cell. The corresponding electrochemical parameters were applied during electrolysis. After electrolysis the solvent was removed under reduced pressure, and the residue was prepared for internal standard procedure for gas chromatography measurements or purified by column chromatography (cyclohexane/ethyl acetate (4 : 1)). The desired product was obtained as colourless solid. mp: 159 °C (cyclohexane/ethyl acetate (8 : 2)); R<sub>f</sub>: 0.23 (cyclohexane/ethyl acetate (4 : 1)); MS (FD): *m/z* = 302.3 (calculated for M: C<sub>18</sub>H<sub>22</sub>O<sub>4</sub> = 302.3)

**<sup>1</sup>H NMR** (400 MHz, CDCl<sub>3</sub>): δ [ppm] = 7.29 (dd, <sup>3,4</sup>*J* = 8.5, 2.5 Hz, 1H, *H*-4'), 7.24 (d, <sup>4</sup>*J* = 2.5 Hz, 1H, *H*-6'), 6.94 (d, <sup>3</sup>*J* = 8.5 Hz, 1H, *H*-3'), 6.68 (s, 2H, *H*-2, *H*-6), 3.92 (s, 6H, *H*-7, *H*-8), 1.34 (s, 9H, *H*-8').

Analytical data in agreement with those previously reported.<sup>4</sup>

### 7.3 Methyl 3-hydroxy-4-(4'-hydroxy-3',5'-dimethoxyphenyl)-2-naphthoate

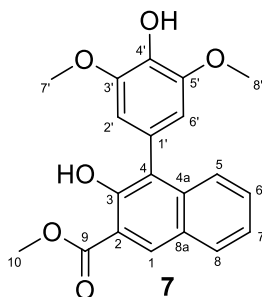

2,6-Dimethoxyphenol **4** and methyl 3-hydroxy-2-naphthoate **7** were dissolved in a solution of HFIP and MeBu<sub>3</sub>NO<sub>3</sub>SOMe. The solution was transferred into a beaker-type cell or pumped through the electrochemical flow cell. The corresponding electrochemical parameters were applied during electrolysis. After electrolysis the solvent was removed under reduced pressure, and the residue was prepared for internal standard procedure for gas chromatography measurements or purified by column chromatography (cyclohexane/ethyl acetate (9 : 1)). The desired product was obtained as yellow solid. mp: 192 °C (cyclohexane/ethyl acetate (9 : 1)); R<sub>f</sub>: 0.24 (cyclohexane/ethyl acetate (9 : 1)); MS (FD):  $m/z$  = 354.1 (calculated for M: C<sub>20</sub>H<sub>18</sub>O<sub>6</sub> = 354.1)

**<sup>1</sup>H NMR** (400 MHz, CDCl<sub>3</sub>):  $\delta$  [ppm]= 10.73 (s, 1H, *H*-3), 8.56 (s, 1H, *H*-1), 7.85 (ddd, <sup>3,4,5</sup>*J* = 8.2, 1.3, 0.5 Hz, 1H, *H*-8), 7.54 (dd, <sup>3,4</sup>*J* = 8.6, 1.3 Hz, 1H, *H*-5), 7.45 (ddd, <sup>3,3,4</sup>*J* = 8.6, 6.7, 1.3 Hz, 1H, *H*-6), 7.35 (ddd, <sup>3,3,4</sup>*J* = 8.2, 6.7, 1.3 Hz, 1H, *H*-7), 6.62 (s, 2H, *H*-2', *H*-6'), 4.05 (s, 3H, *H*-10), 3.89 (s, 6H, *H*-7', *H*-8').

## 8 References

- (1) Armarego, W. L. F.; Chai, C. L. L. *Purification of Laboratory Chemicals*, 7th ed.; Butterworth-Heinemann: Kidlington, Oxford, U.K., Waltham, MA, USA, 2013.
- (2) Kirste, A.; Schnakenburg, G.; Stecker, F.; Fischer, A.; Waldvogel, S. R. Anodic Phenol-Arene Cross-Coupling Reaction on Boron-Doped Diamond Electrodes, *Angew. Chem. Int. Ed.* **2010**, *49*, 971–975.
- (3) Elsler, B.; Schollmeyer, D.; Dyballa, K. M.; Franke, R.; Waldvogel, S. R. Metal- and Reagent-Free Highly Selective Anodic Cross-Coupling Reaction of Phenols, *Angew. Chem. Int. Ed.* **2014**, *53*, 5210–5213.
- (4) Riehl, B.; Dyballa, K.; Franke, R.; Waldvogel, S. R. Electro-Organic Synthesis as a Sustainable Alternative for Dehydrogenative Cross-Coupling of Phenols and Naphthols, *Synthesis* **2016**, *49*, 252–259.
